# Supplementary material for: Recycling alloy scrap and CO2 by paired molten salt electrolysis
Source: Royal Society of Chemistry journal article supplement (doi:10.1039/d2se00893a), 2022-01-01
Supplement: d2se00893a1.pdf [file d2se00893a1.pdf]

## **Recycling alloy scraps and CO<sub>2</sub> by paired molten salt electrolysis**

Xiang Chen<sup>1</sup>, Yuan Sun<sup>3</sup>, Yan Zhao<sup>1</sup>, Long Wang<sup>1,3</sup>, Hongwei Xie<sup>1</sup>, Jiakang Qu<sup>1</sup>, Shuaibo Gao<sup>2</sup>,

Dihua Wang<sup>2</sup>, Huayi Yin<sup>1,2\*</sup>

1 Key Laboratory for Ecological Metallurgy of Multimetallic Mineral of Ministry of Education,

School of metallurgy, Northeastern University, Shenyang, P. R. China, 110819

2. School of Resource and Environmental Science, Wuhan University, Wuhan, P.R. China, 430072

3 Institute of Metal Research, Chinese Academy of Science, Shenyang, P. R. China, 110016

Email : [yinhuayi@whu.edu.cn](mailto:yinhuayi@whu.edu.cn)

**Supplementary table and figure captions:**

**Table S1. Standard reduction potential  $E^\theta$  for involved redox reactions in molten  $\text{CaCl}_2$ -  
NaCl, calculated from thermodynamic data ( $E_{\text{Ca}^{2+}/\text{Ca}} = 0$ ) at 700°C obtained from HSC**

**Chemistry 6.0**

| Reactions                                               | $E^\theta$ (V) |
|---------------------------------------------------------|----------------|
| $\text{Ca} + \text{FeCl}_2 = \text{Fe} + \text{CaCl}_2$ | 2.216          |
| $\text{Ca} + \text{NiCl}_2 = \text{Ni} + \text{CaCl}_2$ | 2.535          |
| $\text{Ca} + \text{CrCl}_2 = \text{Cr} + \text{CaCl}_2$ | 1.933          |
| $\text{Ca} + \text{CoCl}_2 = \text{Co} + \text{CaCl}_2$ | 2.422          |
| $\text{Ca} + \text{MnCl}_2 = \text{Mn} + \text{CaCl}_2$ | 1.516          |
| $\text{Ca} + \text{MoCl}_2 = \text{Mo} + \text{CaCl}_2$ | 2.617          |
| $\text{Ca} + 2\text{CuCl} = 2\text{Cu} + \text{CaCl}_2$ | 2.392          |
| $\text{Ca} + \text{Cl}_2(\text{g}) = \text{CaCl}_2$     | 3.363          |

**Table S2. Standard reduction potential  $E^\theta$  for involved redox reactions in molten  $\text{CaCl}_2$ -  
NaCl- $\text{CaCO}_3$ , calculated from thermodynamic data ( $E_{\text{Ca}^{2+}/\text{Ca}} = 0$ ) at 700°C obtained from**

**HSC Chemistry 6.0**

| Reactions                                                                                   | $E^\theta$ (V) |
|---------------------------------------------------------------------------------------------|----------------|
| $\text{CaCO}_3 + \text{Fe} = \text{Ca} + \text{FeO} + \text{CO}_2(\text{g})$                | 1.862          |
| $\text{CaCO}_3 + \text{Ni} = \text{Ca} + \text{NiO} + \text{CO}_2(\text{g})$                | 2.121          |
| $\text{CaCO}_3 + \text{Co} = \text{Ca} + \text{CoO} + \text{CO}_2(\text{g})$                | 2.045          |
| $3\text{CaCO}_3 + 2\text{Cr} = 3\text{Ca} + \text{Cr}_2\text{O}_3 + 3\text{CO}_2(\text{g})$ | 1.386          |
| $\text{CaCO}_3 + \text{Mn} = \text{Ca} + \text{MnO} + \text{CO}_2(\text{g})$                | 1.278          |
| $2\text{CaCO}_3 + \text{Mo} = 2\text{Ca} + \text{MoO}_2 + 2\text{CO}_2(\text{g})$           | 1.838          |
| $\text{CaCO}_3 + 2\text{Cu} = \text{Ca} + \text{Cu}_2\text{O} + \text{CO}_2(\text{g})$      | 2.397          |
| $2\text{CaCO}_3 = 2\text{Ca} + 2\text{CO}_2(\text{g}) + \text{O}_2(\text{g})$               | 2.903          |

**Table S3. The composition of the Hard-alloy.**

| Elements             | Fe    | Cr    | Ni   | Co   | Cu   | Mn   | others |
|----------------------|-------|-------|------|------|------|------|--------|
| Composition<br>(wt%) | 57.03 | 12.38 | 8.15 | 1.96 | 0.63 | 6.18 | 13.67  |

**Table S4 The element composition and content (wt%) table of oxide powder (A) after oxidation process, (B) water-leaching and (C) sulfation roasting products.**

| Elements<br>Products | Fe    | Cr    | Ni   | Co   | Mn   | Cu   |
|----------------------|-------|-------|------|------|------|------|
| A                    | 15.81 | 5.82  | 2.83 | 0.73 | 1.90 | 0.18 |
| B                    | 45.43 | 14.86 | 6.45 | 1.16 | 3.93 | 0.32 |
| C                    | 20.51 | 4.65  | 2.03 | 0.65 | 1.92 | 0.21 |

  

| Elements<br>Products | O     | S     | Ca    | Na   | Cl    | C    |
|----------------------|-------|-------|-------|------|-------|------|
| A                    | 23.24 | 0     | 13.42 | 1.34 | 24.13 | 8.75 |
| B                    | 20.25 | 0     | 0.69  | 0    | 0     | 5.58 |
| C                    | 41.21 | 21.32 | 0.57  | 0    | 0     | 0    |

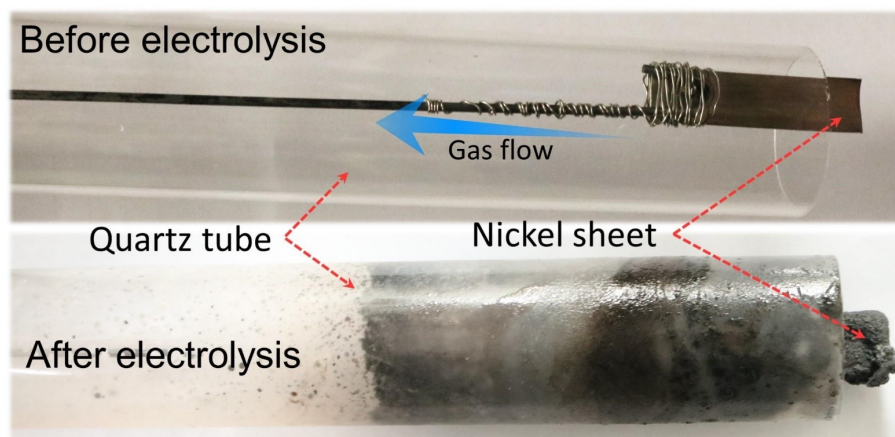

**Fig. S1 Digital images of home-made quartz tube for collecting cathode gas products before and after electrolysis**

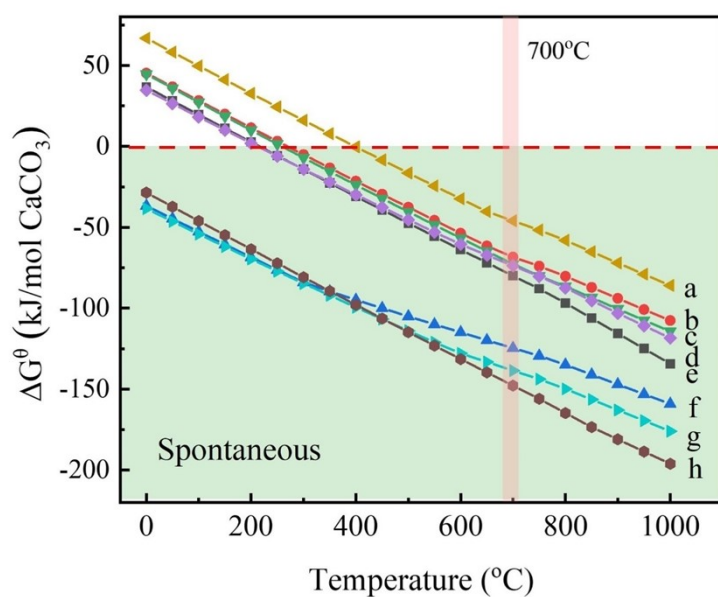

- a:  $\text{MnCl}_2 + \text{CaCO}_3 = \text{CaCl}_2 + \text{MnO} + \text{CO}_2(\text{g})$ ;  
b:  $\text{FeCl}_2 + \text{CaCO}_3 = \text{CaCl}_2 + \text{FeO} + \text{CO}_2(\text{g})$ ;  
c:  $\text{CoCl}_2 + \text{CaCO}_3 = \text{CaCl}_2 + \text{CoO} + \text{CO}_2(\text{g})$ ;  
d:  $\text{CuCl}_2 + \text{CaCO}_3 = \text{CaCl}_2 + \text{CuO} + \text{CO}_2(\text{g})$ ;  
e:  $\text{NiCl}_2 + \text{CaCO}_3 = \text{CaCl}_2 + \text{NiO} + \text{CO}_2(\text{g})$ ;  
f:  $\frac{2}{3}\text{FeCl}_3 + \text{CaCO}_3 = \text{CaCl}_2 + \frac{1}{3}\text{Fe}_2\text{O}_3 + \text{CO}_2(\text{g})$ ;  
g:  $\frac{2}{3}\text{MnCl}_3 + \text{CaCO}_3 = \frac{1}{3}\text{Mn}_2\text{O}_3 + \text{CaCl}_2 + \text{CO}_2(\text{g})$ ;  
h:  $\frac{2}{3}\text{CrCl}_3 + \text{CaCO}_3 = \frac{1}{3}\text{Cr}_2\text{O}_3 + \text{CaCl}_2 + \text{CO}_2(\text{g})$

Fig. S2 Gibbs energy change as a function of the temperature of the reactions between metal chloride and calcium carbonate.

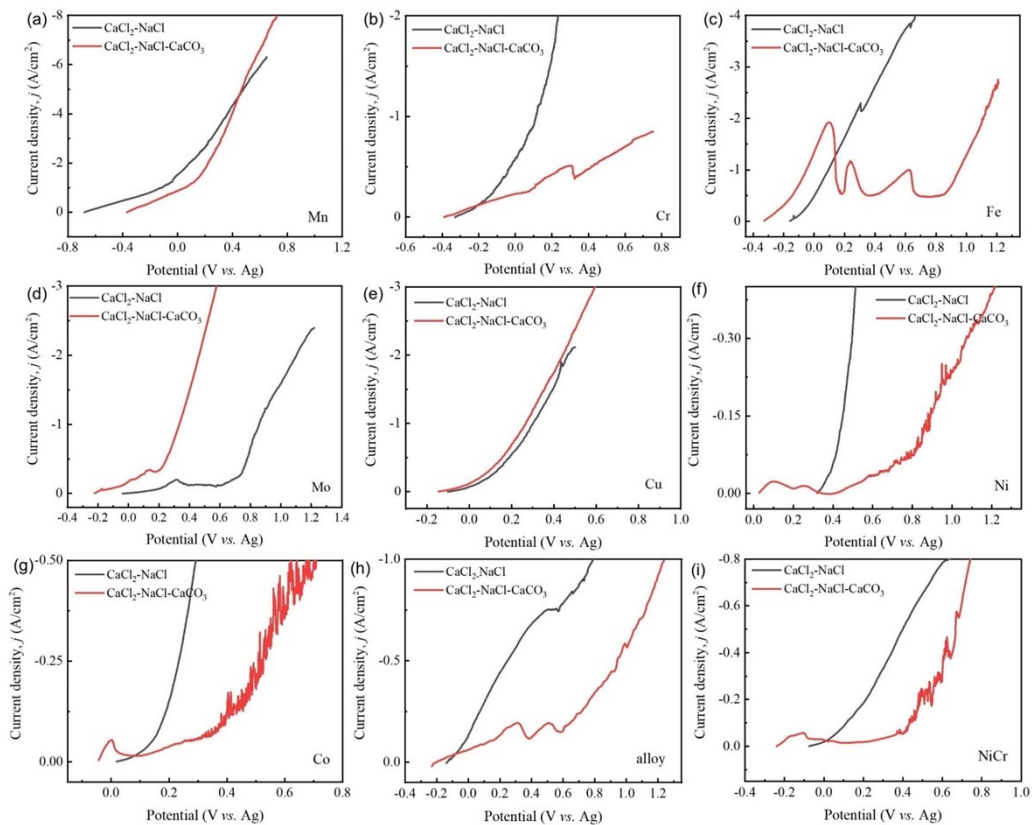

Fig. S3 Polarization curves of various metals in molten  $\text{CaCl}_2\text{-NaCl}$  and molten  $\text{NaCl-CaCl}_2\text{-CaCO}_3$  (a = Mn, b = Cr, c = Fe, d = Mo, e = Cu, f = Ni, g = Co, h = hard-alloy and i = NiCr).

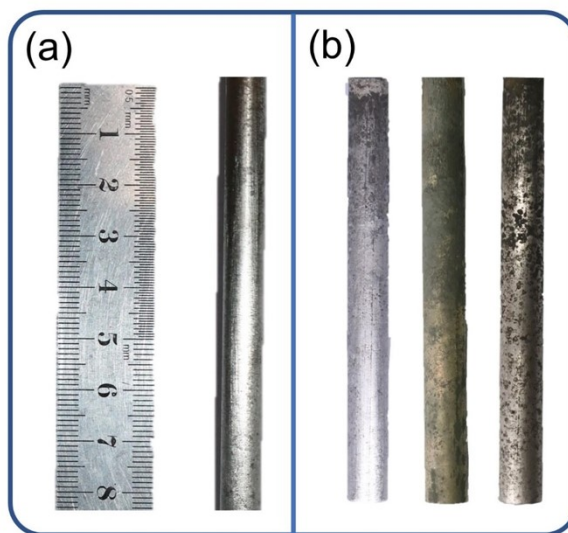

Fig. S4 Digital photos of (a) hard-alloy and (b) before and after oxidation in air at 700 °C for 6 h.

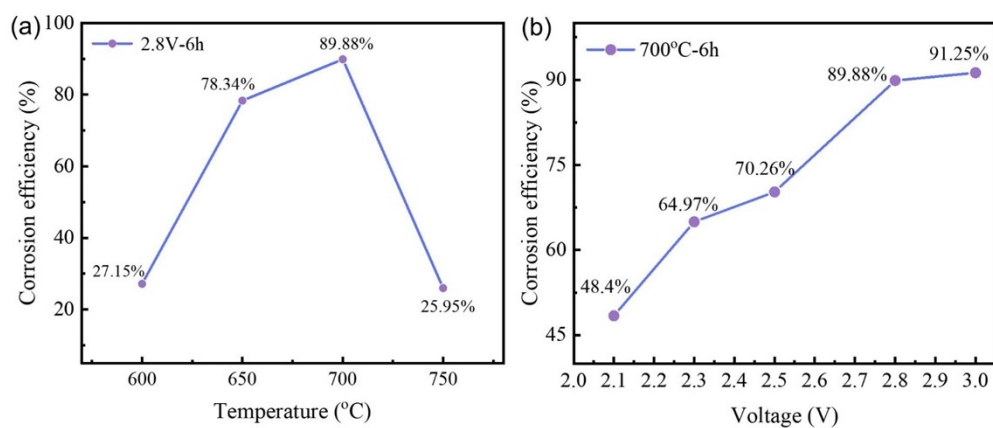

Fig. S5 Profiles of the corrosion efficiency (a) at different electrolysis temperatures and (b) the different cell voltages.

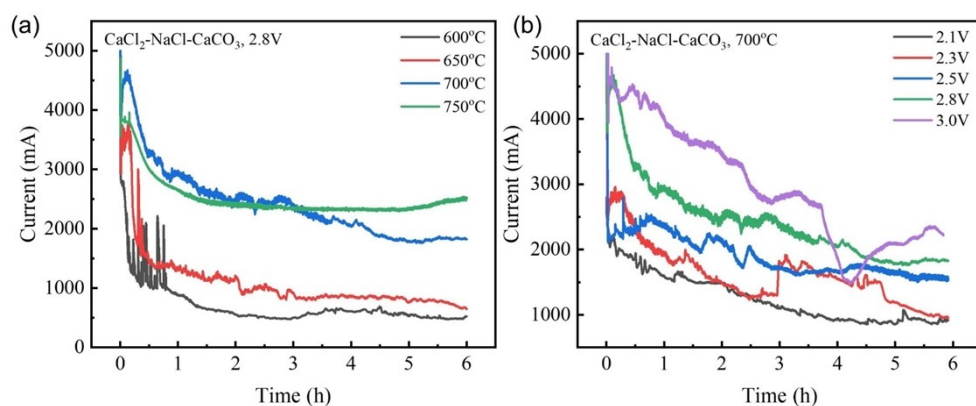

Fig. S6 I-t curves during the electrolysis of hard-alloy in molten  $\text{CaCl}_2\text{-NaCl-CaCO}_3$  (a) at different temperatures (cell voltage was maintained at 2.8 V) and (b) at different cell voltages (electrolysis temperature was 700 °C) for 6h.

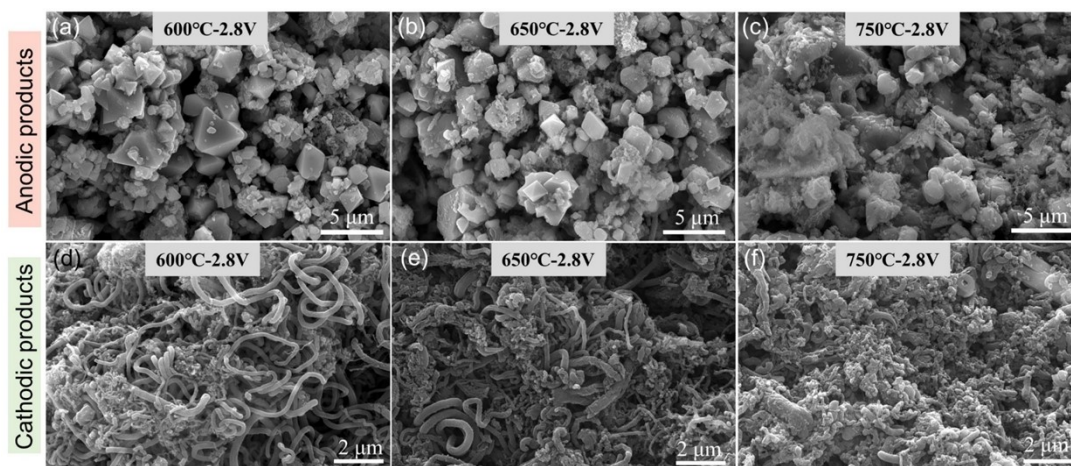

Fig. S7 SEM images of (a) anode products and (b) cathode products at different temperatures at 2.8 V for 6 h with hard-alloy as the anode and nickel sheet as the cathode.

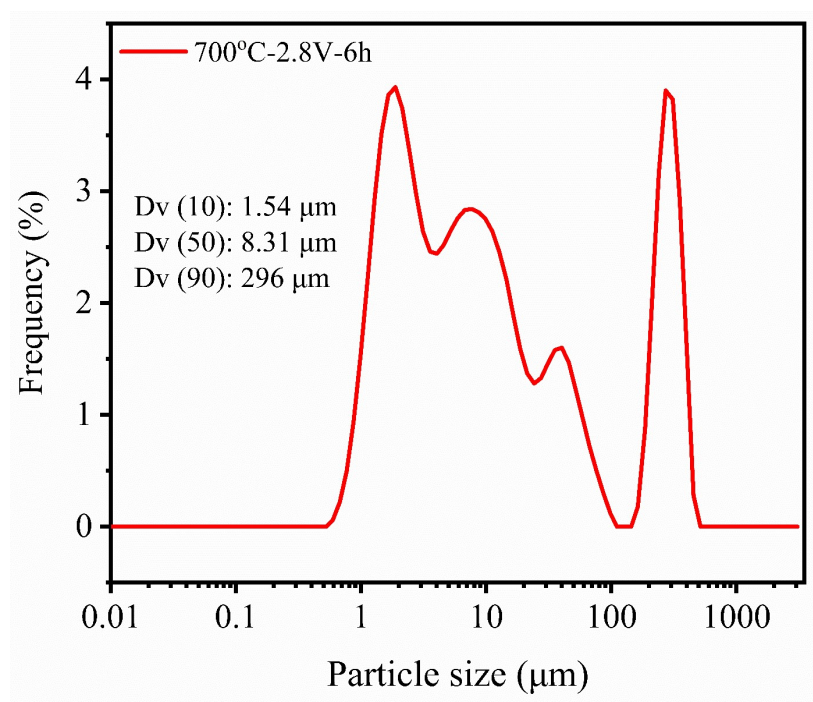

Fig. S8 Particle size distribution of the products after electrochemical oxidation of alloy scraps.



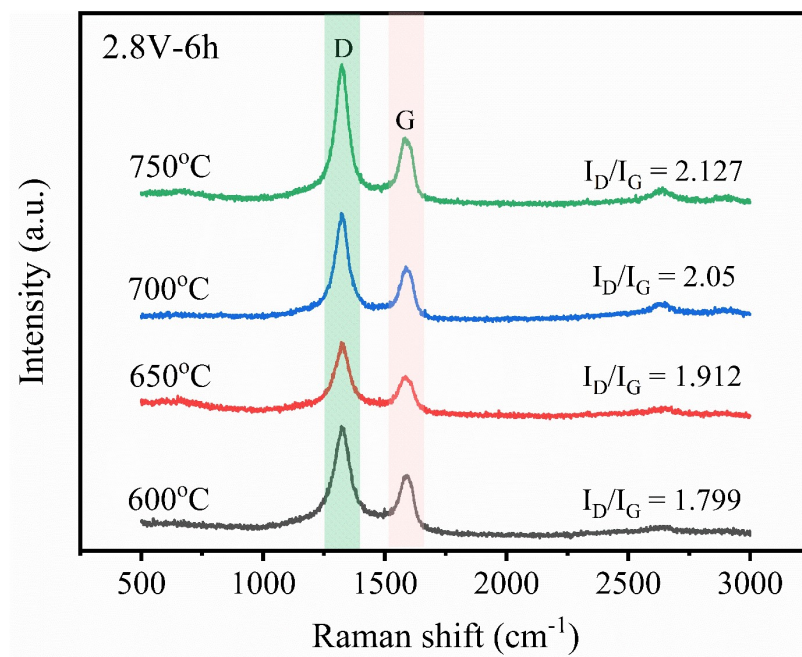

Fig. S9 Raman spectra of the cathode products at 2.8V for 6h.

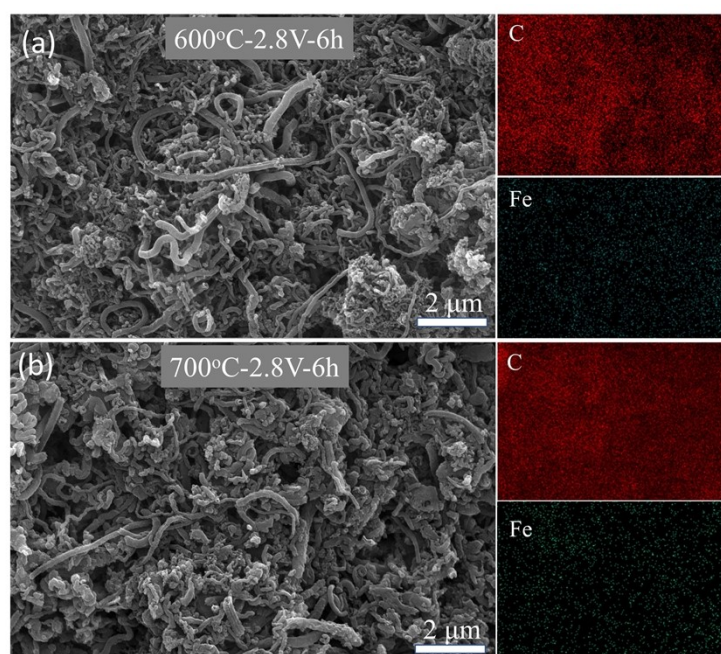

Fig. S10 SEM images and EDS element mapping of the cathode products at (a) 700 °C and (b) 600 °C, 2.8V for 6h.



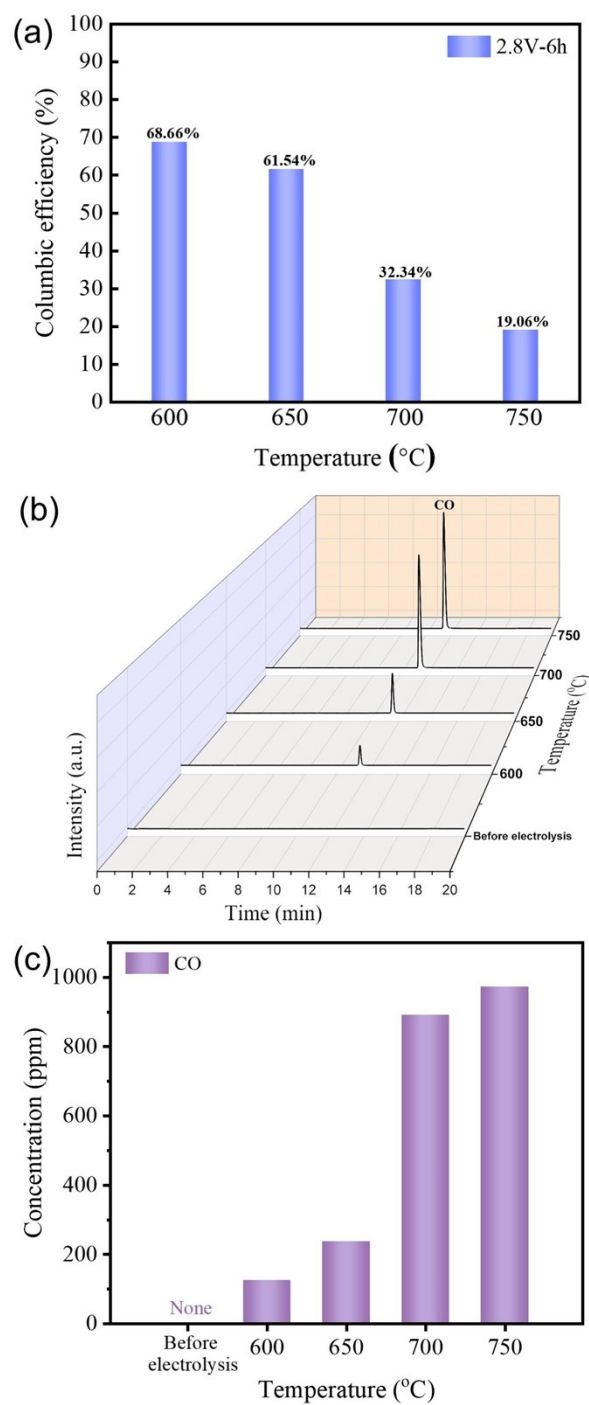

Fig. S11 (a) Bar graph of Coulombic efficiency of cathode products carbon, (b) gas chromatograms of the outlet gas before and during electrolysis at different temperatures, and (c) bar graph of the CO content obtained under different temperatures at 2.8V for electrolysis time of 3h.

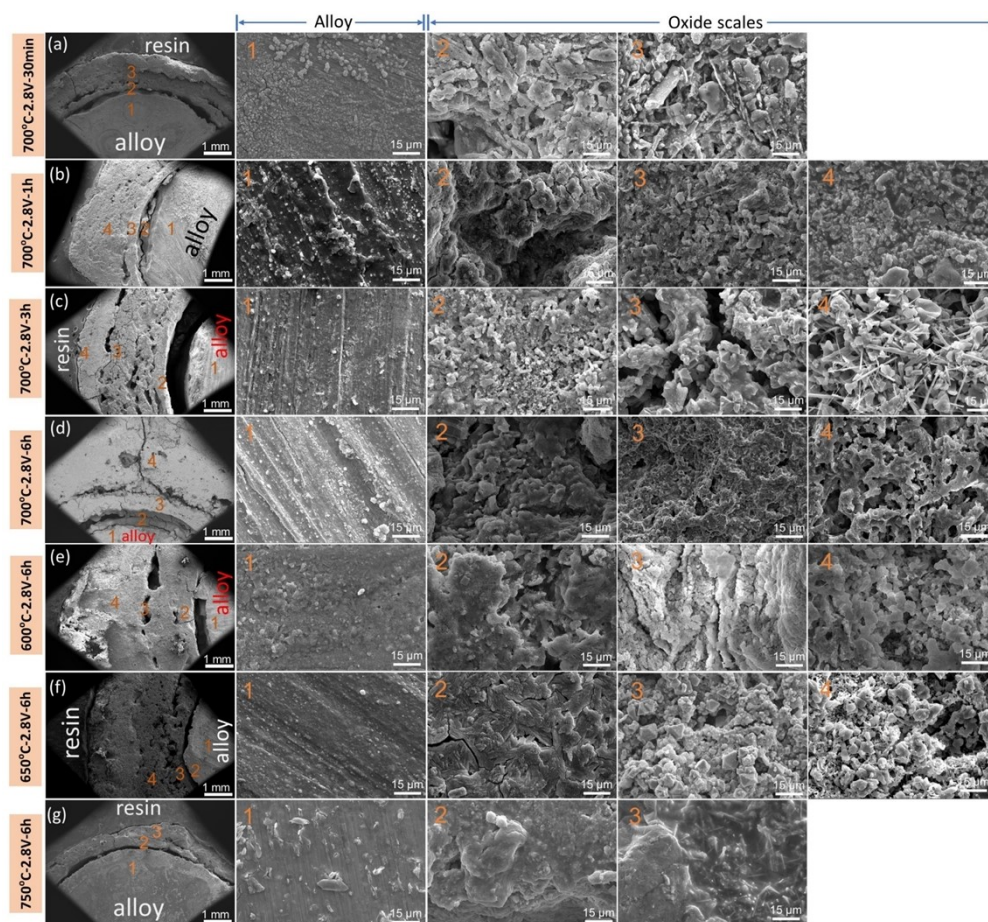

Fig. S12 SEM images of the cross section and the morphology at different areas (from left to right corresponding to the alloy substrate towards the oxides scale) of the alloy oxidation products in molten NaCl-CaCl<sub>2</sub> with 10wt% CaCO<sub>3</sub> at 700 °C, 2.8 V for (a) 30 min, (b) 1 h, (c) 3 h, (d) 6 h and at (e) 600 °C, (f) 650 °C, (g) 750 °C and 2.8 V for 6 h.

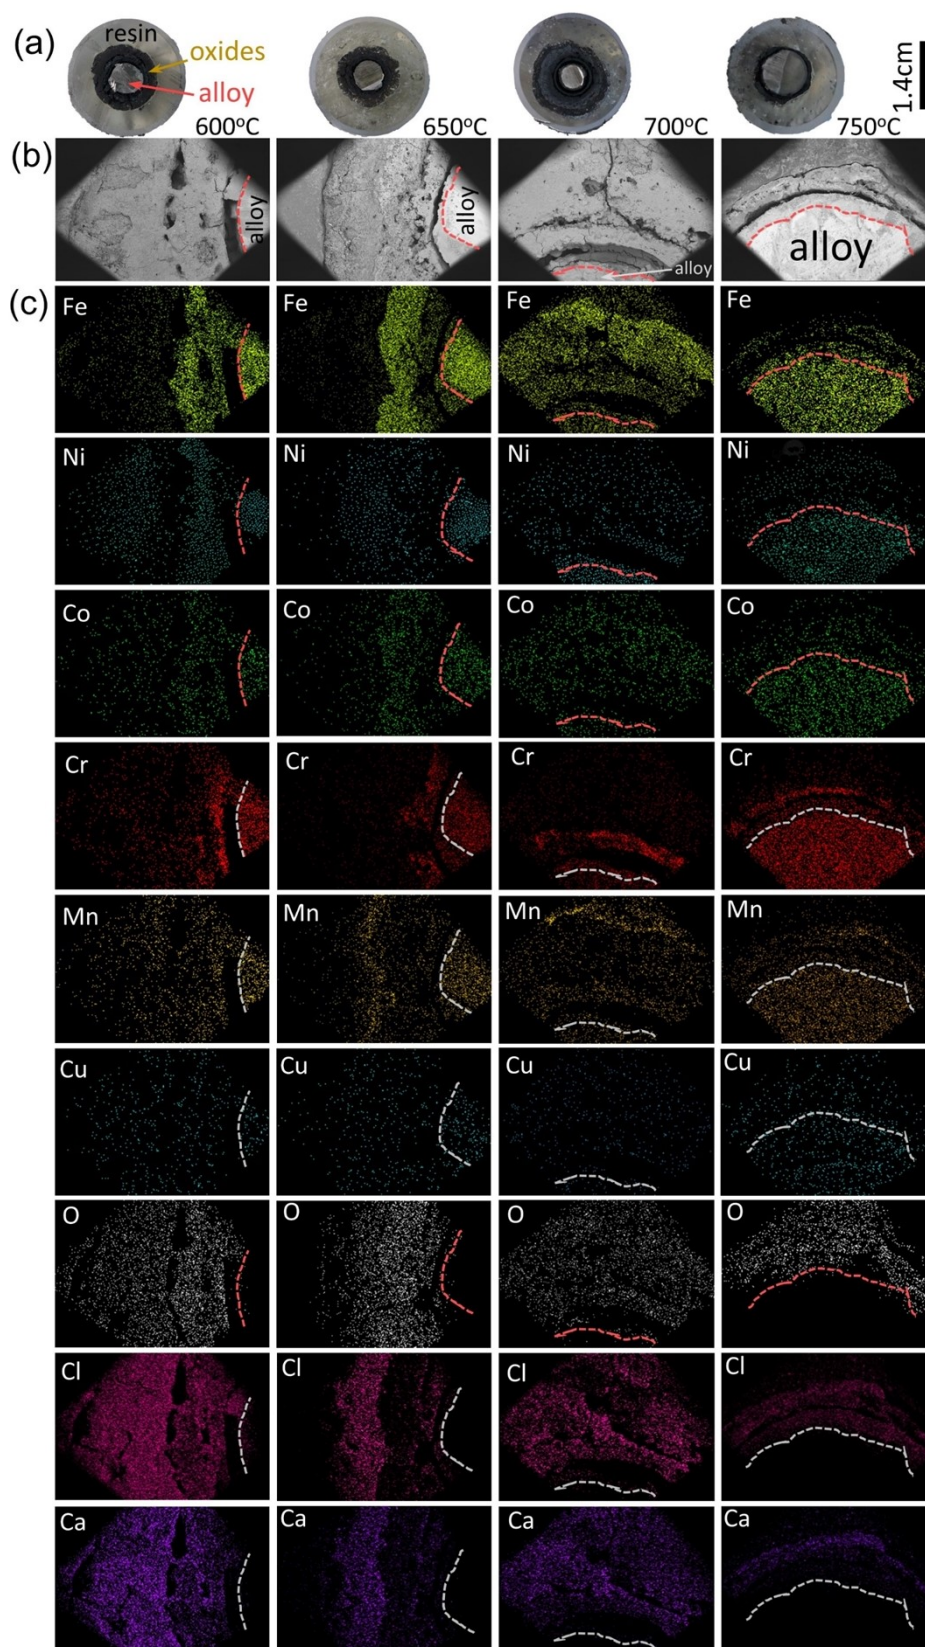

Fig. S13 (a) Digital photos, (b) SEM images, and (c) EDS mappings of the cross sections of the hard-alloy oxidation products after electrolysis at 600, 650, 700, and 750 °C for 6 h at 2.8 V in molten  $\text{CaCl}_2\text{-NaCl}$  with 10wt%  $\text{CaCO}_3$ .



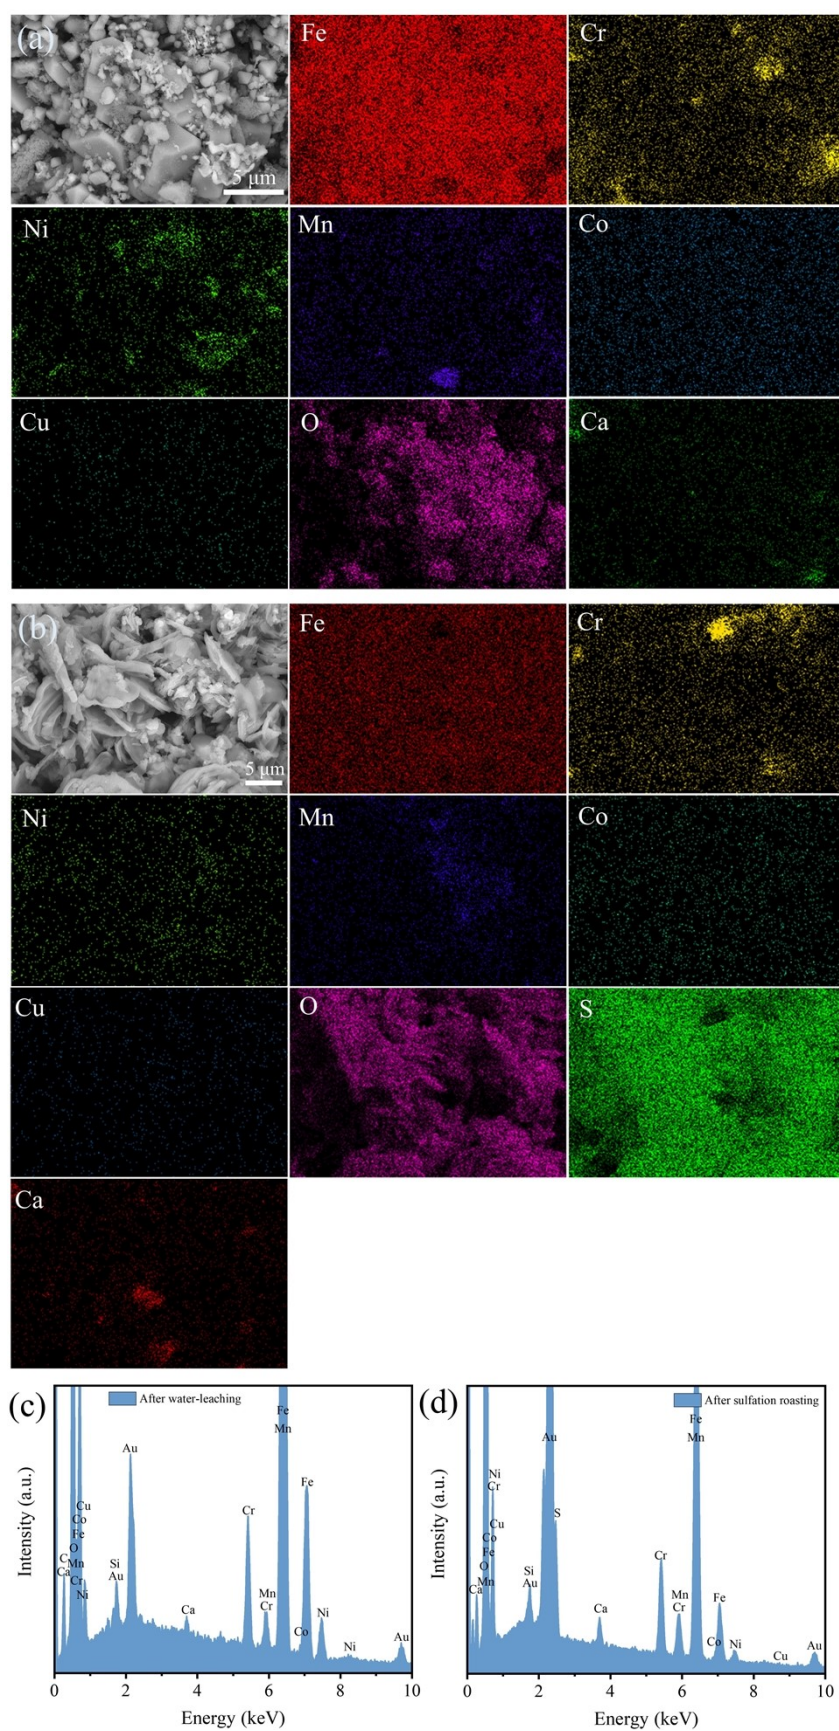

Fig. S14 SEM images and EDS mapping of the anode products after (a, c) water-leaching and (b,

d) sulfation roasting.

## Details of economic assessment

The operational cost of this technology included reagents (e.g. electrolyte and sulfuric acid), material (e.g. electrode materials), and electricity (energy consumption for heating and holding process during molten salt electrolysis and sulfating roasting). The single experiment was calculated with 550 g molten salt electrolyte, in which 550 g molten salt was mixed with 500 g of  $\text{CaCl}_2\text{-NaCl}$  and 50 g of  $\text{CaCO}_3$ . The heating rate was calculated at 5 °C/min. The technological conditions for economic assessment were 700 °C, constant voltage electrolysis for 8 h at 2.8 V. The cost of sulfating roasting was calculated according to the experiment conditions: liquid-solid ratio of 0.8, roasting temperature of 150 °C and the roasting time of 4 hours. Note that the molten salt with mass of 550 g is capable of treatment for 185.3 g of alloy scraps. The assumption of the costs of electricity charge: the industrial electricity charge is \$0.158/kWh, and the energy consumption ( $E_p$ ) is calculated as Equation S1.

$$E_p = P \times t \quad (\text{S1})$$

Where the  $E_p$  is the energy consumption;  $P$  is the power of the vertical furnace;  $t$  is the time of heating or isothermal.

The reagent cost is calculated as Equation S2:

$$C_{reagent} = M \times U.P. \quad (\text{S2})$$

Where the  $C_{reagent}$  is cost of reagent;  $M$  is the mass of reagent;  $U.P.$  is the unit price.

The specific costs are as follows:

$\text{CaCl}_2$ :  $337 \text{ g} \times \$4.72/\text{kg} = \$1.59$ ;

$\text{NaCl}$ :  $163 \text{ g} \times \$2.03/\text{kg} = \$0.33$ ;

$\text{CaCO}_3$ :  $50 \text{ g} \times \$10.54/\text{kg} = \$0.53$ ;

Cathode material (Ni sheet): \$0.37;

Energy consumption for heating and holding process in molten salt electrolysis:  $420 \text{ W} \times 2.5 \text{ h} \times \$0.158/\text{kWh} = 0.17\$$ ;  $120 \text{ W} \times 80 \text{ h} \times \$0.158/\text{kWh} = 1.52\$$ ;

Total amount of sulfuric acid:  $18.53 \text{ g} \times 0.8 \text{ ml/g} \times 10 = 148.24 \text{ ml}$ ;

Sulfuric acid cost:  $148.24 \text{ ml} \times \$0.006/\text{ml} = \$0.89$ ;

Energy consumption for heating and holding process during sulfating roasting:

$$420 \text{ W} \times 0.5 \text{ h} \times \$0.158/\text{kWh} = \$0.03; 120 \text{ W} \times 4 \text{ h} \times \$0.158/\text{kWh} = \$0.08;$$

The above costs add up to \$5.51.

$$\text{The price of product } \text{NiSO}_4 \cdot 6\text{H}_2\text{O}: 38.55 \text{ g} \times \$82.28/500\text{g} = \$6.34;$$

$$\text{The price of product } \text{CoSO}_4 \cdot \text{H}_2\text{O}: 8.78 \text{ g} \times \$21.83/100\text{g} = \$1.92;$$

$$\text{The profit for entire processes (calculation for recovering 185.3g of alloy scraps): } \$6.34 + \$1.92 - \$5.51 = \$2.75;$$

$$\text{The profit for recycling 1 kg of alloy scraps: } \$14.84.$$
